# Supplementary material for: Human NK cell development requires CD56-mediated motility and formation of the developmental synapse
Source: PubMed Central journal article supplement (PMC4961740; doi:10.1038/ncomms12171), 2016-07-20
Supplement: ncomms12171-s1.pdf [file ncomms12171-s1.pdf]

## Supplementary Figure 1

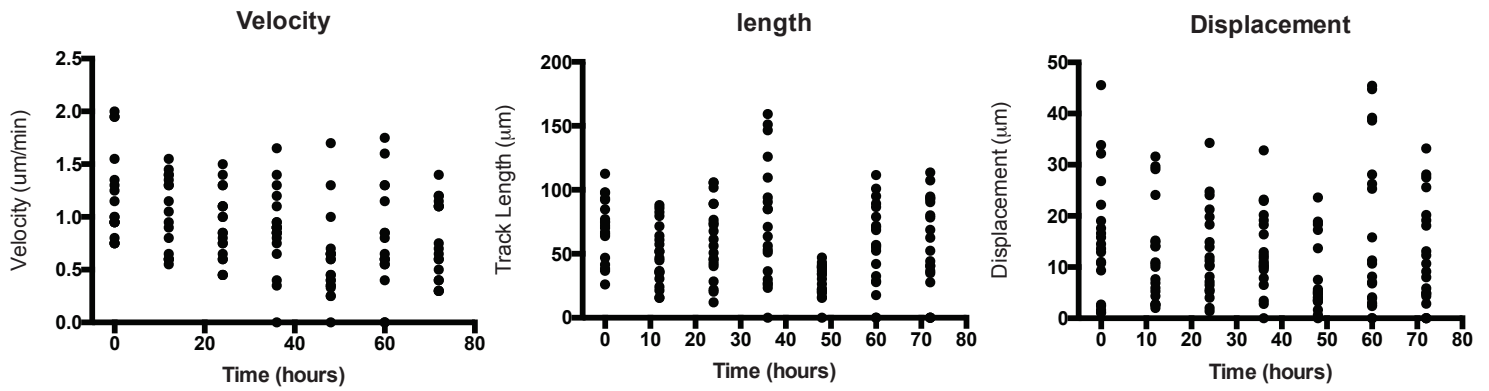

**Supplementary Figure 1. A)** Effect of incubation on track length, displacement and velocity. CD56<sup>bright</sup> NK cells were sorted from peripheral blood and incubated for indicated times (X-axis) prior to imaging every 30 seconds for 30-60 minutes on a Leica SP8 laser scanning confocal microscope using a 63X 1.4 NA objective. Cells were tracked using manual tracking in FIJI. n=17-20 per condition.

## Supplementary Figure 2

A

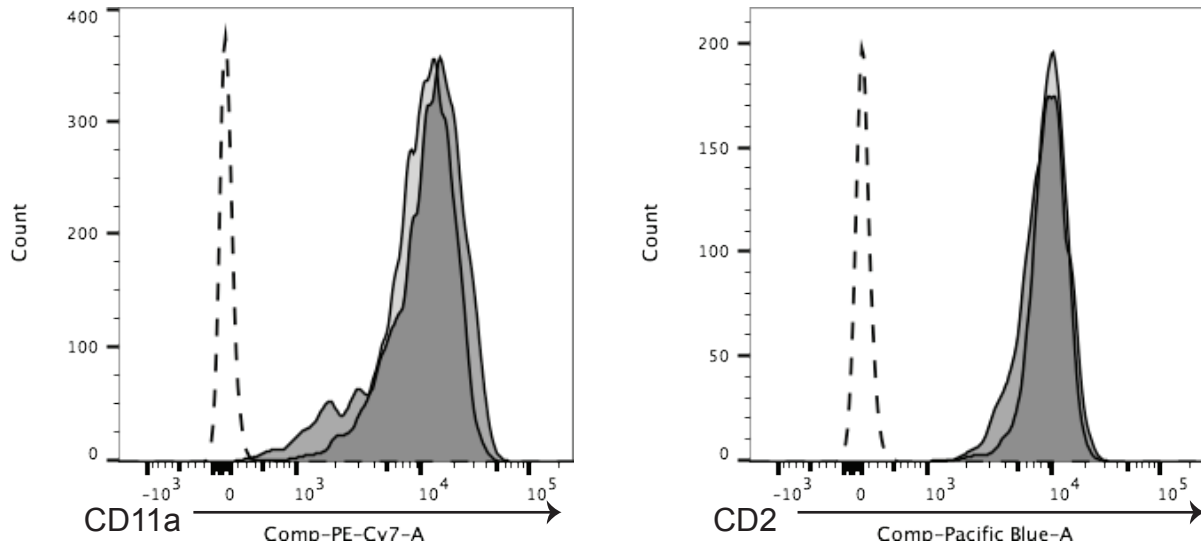

B

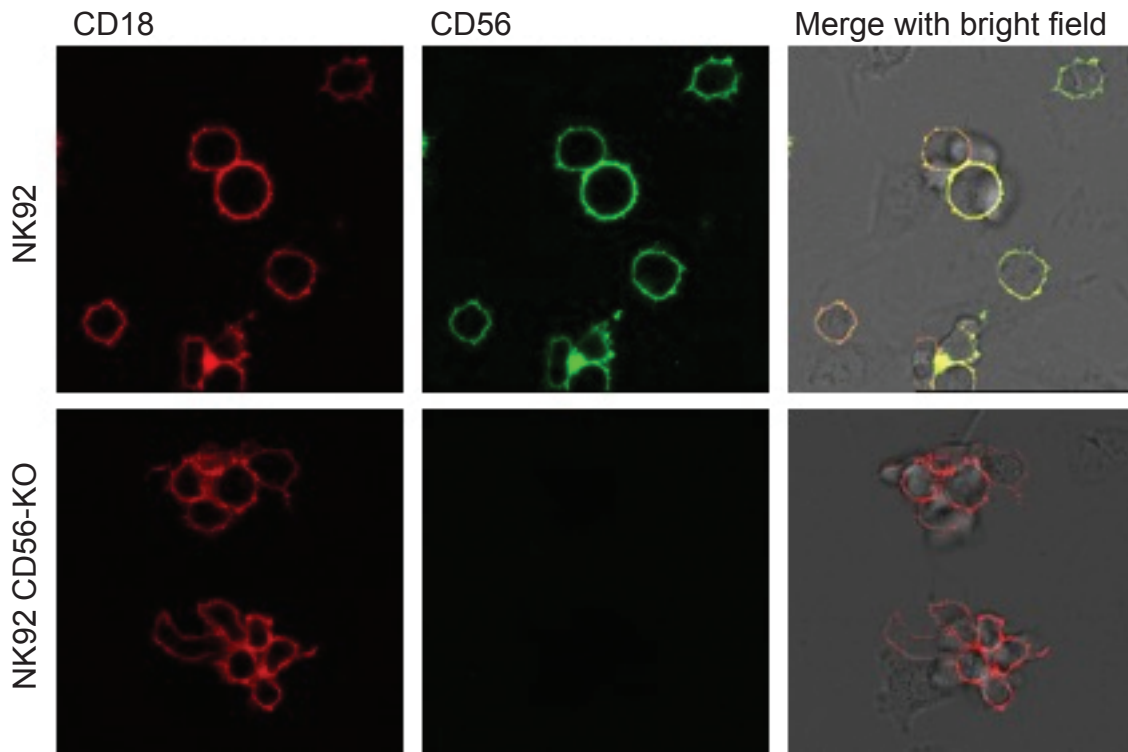

**Supplementary Figure 2. Surface expression of adhesion receptors and CD56 on NK92 CD56-KO cells.** A) Expression of CD11a (left) and CD2 (right) on NK92 CD56-KO cell lines was measured by flow cytometry. Isotype control is shown as a dashed line, wild-type NK92 are represented by the dark histogram and CD56-KO is the light histogram. B) WT NK92 (top) and CD56-KO (bottom) were stained for CD18 (red) and CD56 (green). Representative of three experiments.

### Supplementary Figure 3

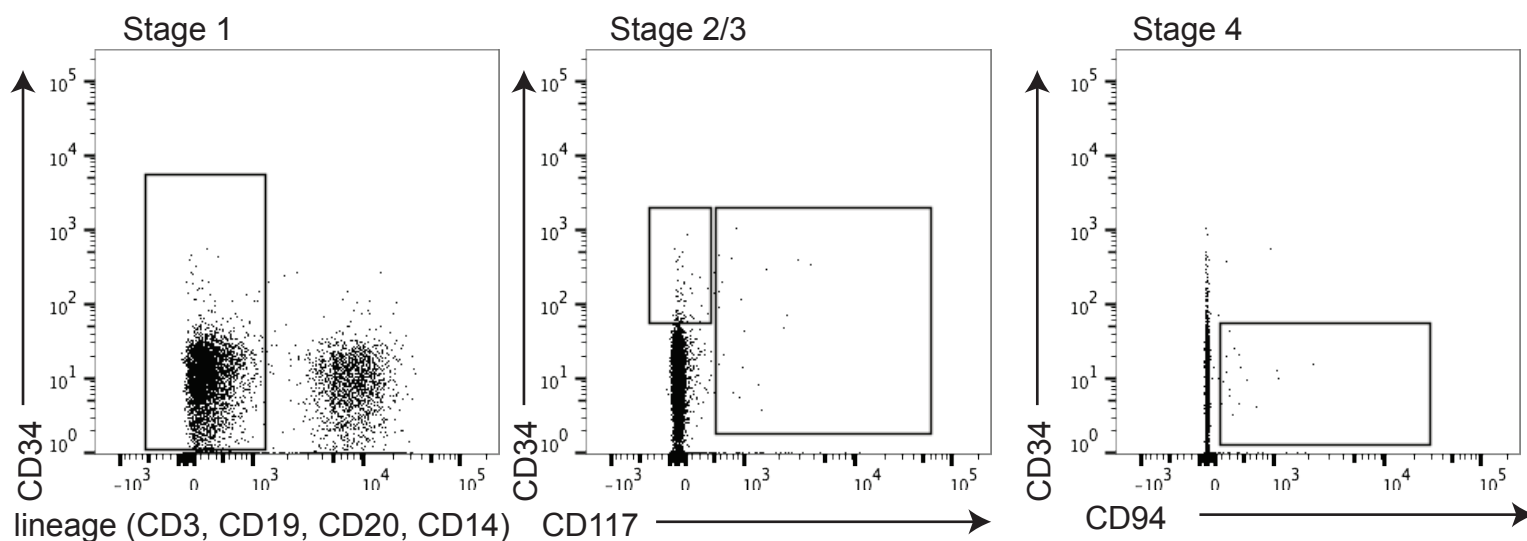

**Supplementary Figure 3. Flow cytometry gating strategy for sorting from tonsils.** Human tonsils were processed as described in Materials and Methods. Cells were gated on lineage negative and then sorted for CD34<sup>+</sup> CD117<sup>-</sup> CD94<sup>-</sup> (Stage 1), CD34<sup>-</sup> CD117<sup>+/-</sup> CD94<sup>-</sup> (Stage 2-3) and CD34<sup>-</sup> CD117<sup>+/-</sup> CD94<sup>+</sup> (Stage 4) as shown. Shown is one representative of three experiments.

### Supplementary Figure 4

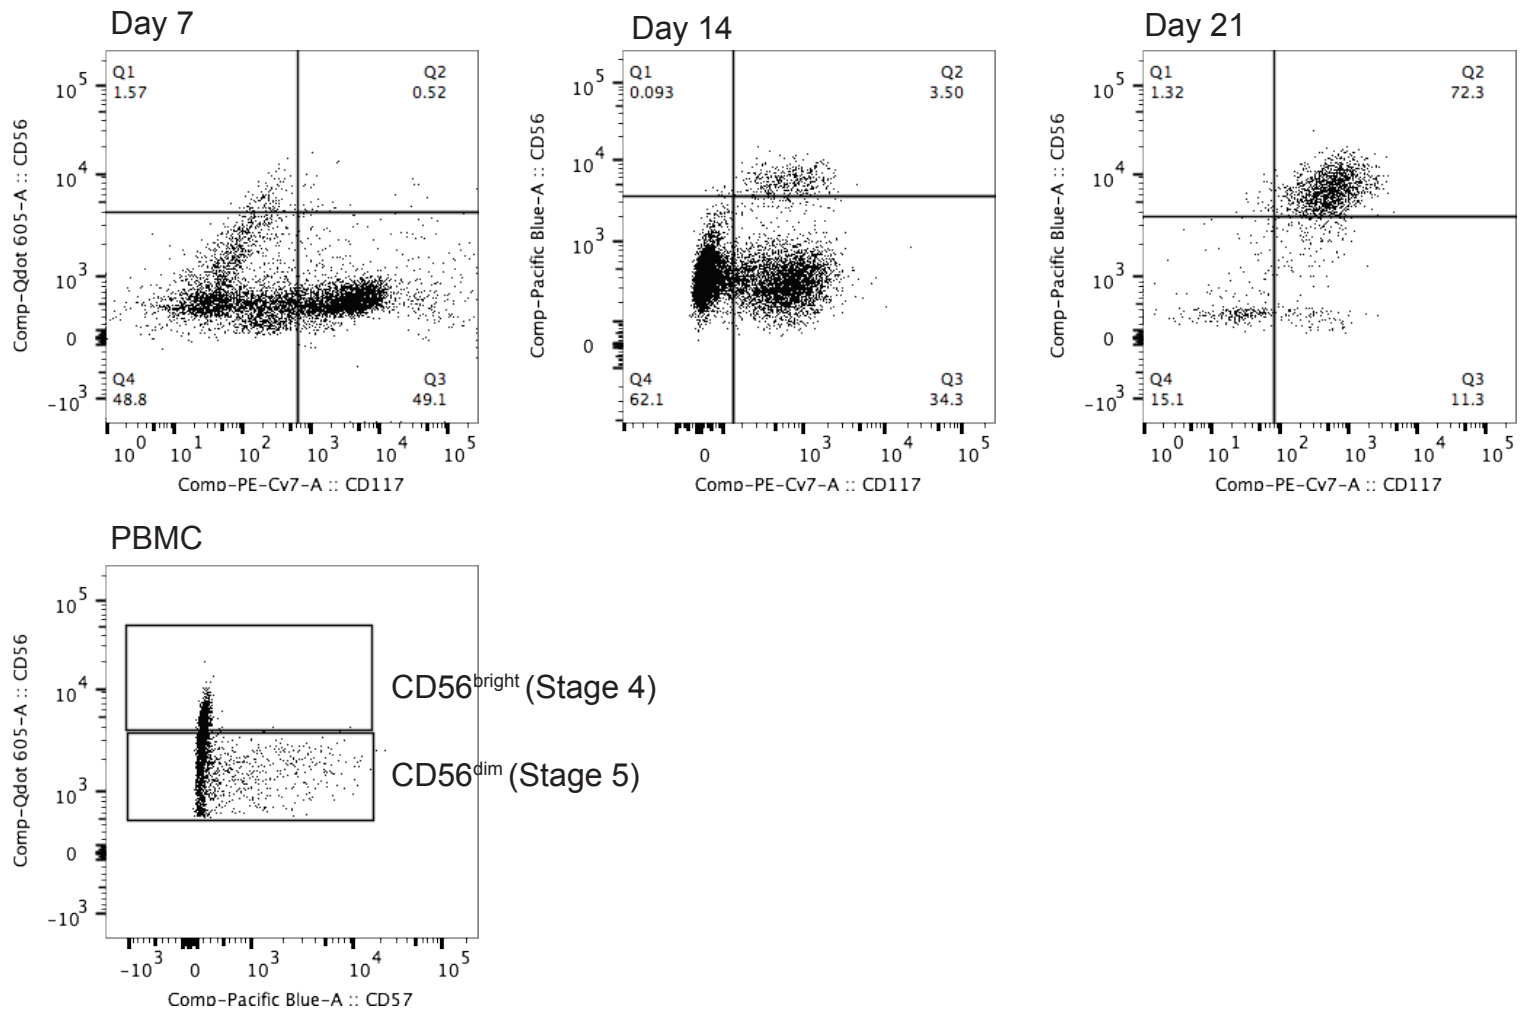

**Supplementary Figure 4. Flow cytometry analysis of CD56 and CD117 expression throughout in vitro differentiation.** In vitro derived NK cells were harvested at time points indicated and evaluated by flow cytometry for markers of interest including CD56 and CD117 (top). CD56 expression fell within the CD56<sup>bright</sup> compartment as determined by comparison with PBMC from the same donor, where CD57 was used to clearly demarcate CD56<sup>bright</sup> from CD56<sup>dim</sup> (bottom panel). Shown is one representative of three experiments.

## Supplementary Figure 5

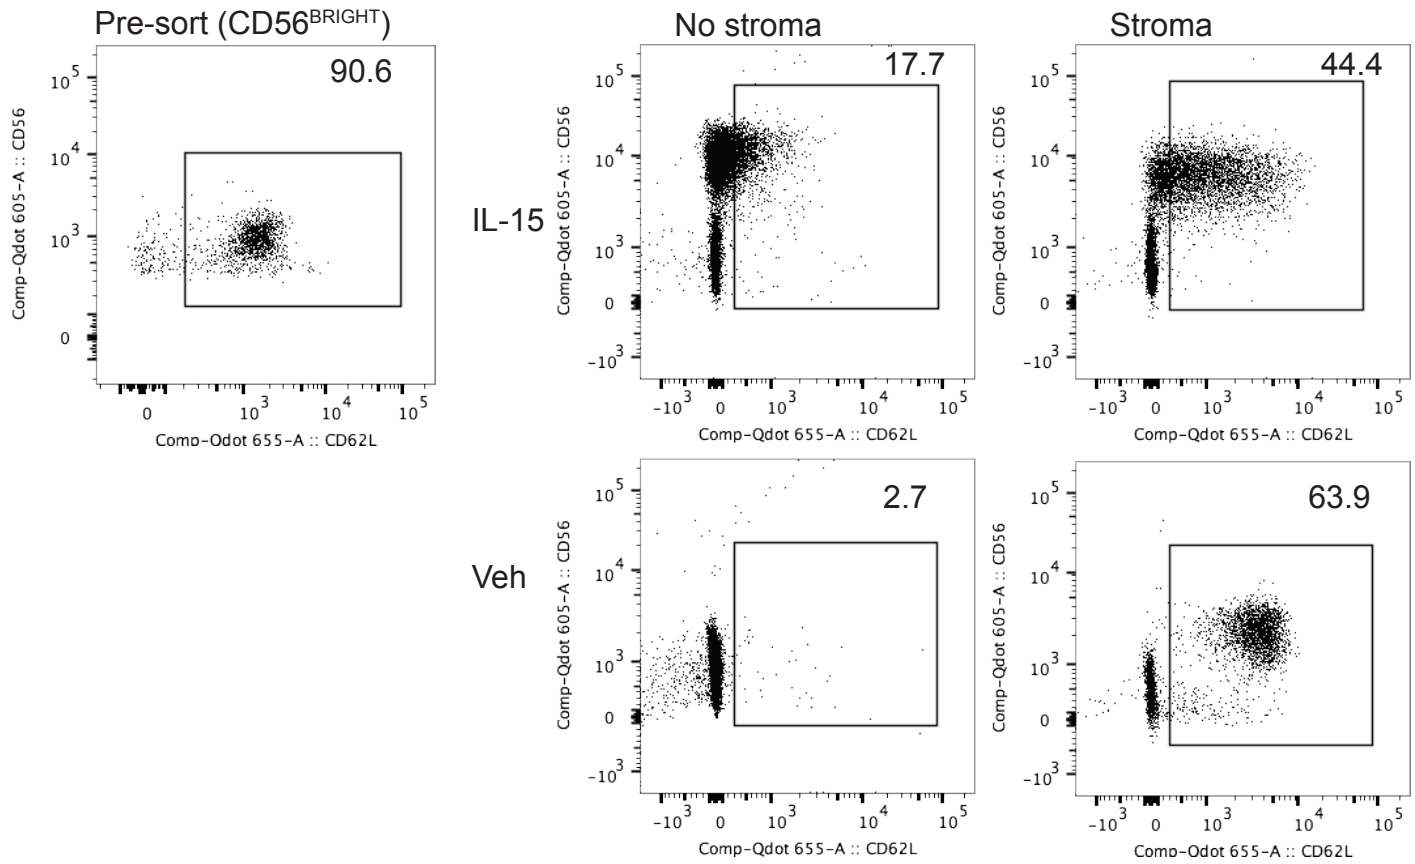

**Supplementary Figure 5. CD62L expression on mature NK cells is reduced in the absence of EL08.1D2 stromal cells.** CD56<sup>bright</sup> NK cells were purified and incubated on EL08.1D2 stromal cells or in uncoated tissue culture dishes for 3 days in the presence of 5 ng/ml IL-15 or vehicle control. Representative FACS plots are shown from one experiment in which cells were analyzed by multiparametric flow cytometry for markers of NK cell maturation.

Supplementary Figure 6

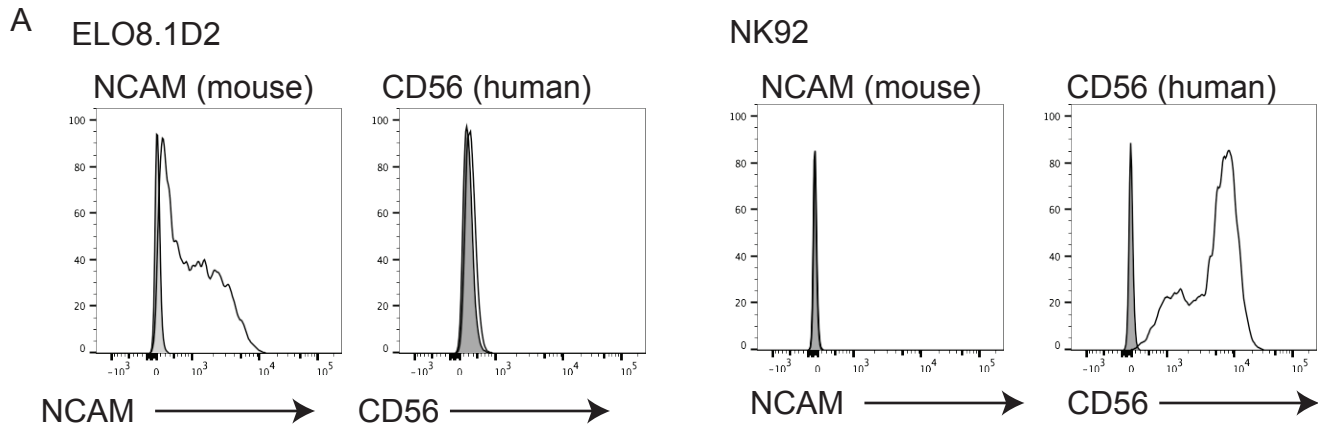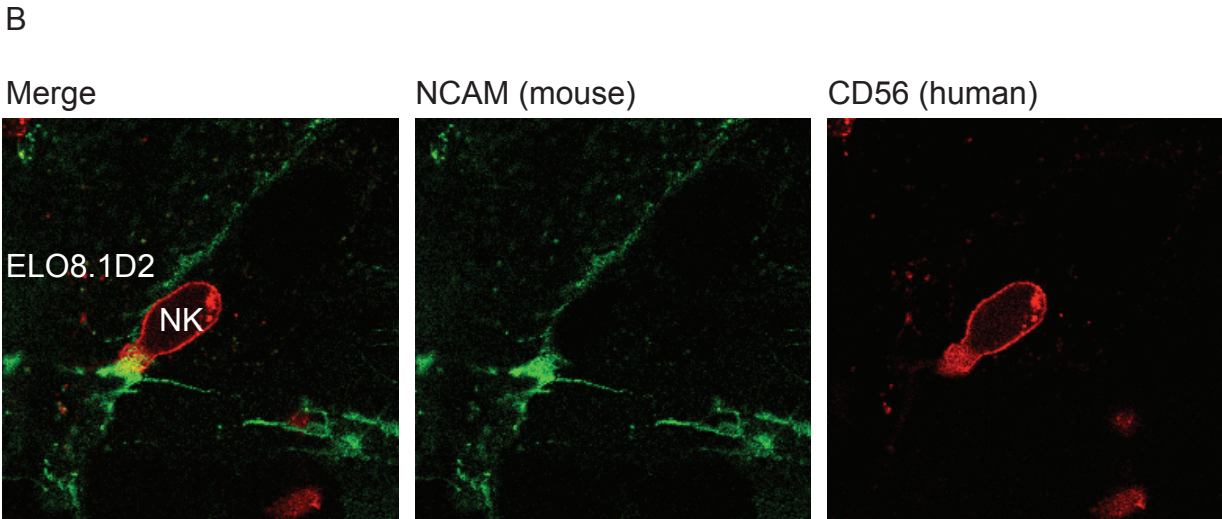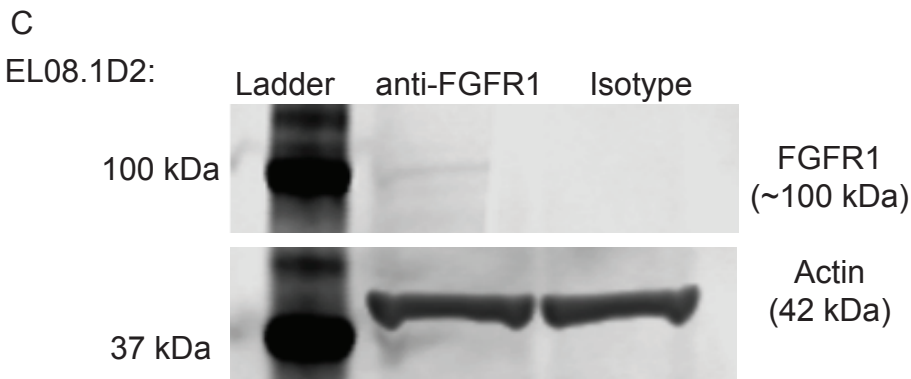

**Supplementary Figure 6. EL08.1D2 stromal cells express previously identified ligands for CD56.** A) EL08.1D2 stromal cells (top) or the NK92 cell line (bottom) were stained with anti-CD56 (human, clone HCD56) or anti-NCAM (mouse, clone 809220) (open histograms) and appropriate isotype control (grey histograms) as indicated. B) EL08.1D2 stromal cells were pre-incubated with anti-NCAM (mouse, clone 809220) and human NK cells labeled with anti-CD56 (HCD56) were conjugated for 60 min. Images were acquired by confocal microscopy. C) EL08.1D2 stromal cell lysates were probed for anti-FGFR1 (top, right; clone M19B2) or with anti-mouse IgG1 isotype control (top, left; clone MOPC-21) and probed in parallel with anti-actin (bottom) as a loading control. Results shown are representative of 3 independent experiments.

Supplementary Table 1: flow cytometry antibodies

| <b>Fluorophore</b> | <b>Marker</b> | <b>Clone; Source; Dilution</b> |
|--------------------|---------------|--------------------------------|
| APC                | CD94          | DX22, Biolegend; 1:100         |
| APC Cy7            | CD34          | 581, Biolegend; 1:100          |
| Pacific Blue       | CD57          | NC1, Beckman Coulter, 1:100    |
| QD605              | CD56          | HCD56, Biolegend, 1:200        |
| QD655              | CD62L         | DREG56, Biolegend, 1:100       |
| QD711              | CD3           | SK7, Biolegend, 1:200          |
| FITC               | Perforin      | δG9, BD Pharmingen, 1:20       |
| PE Cy7             | CD117         | 104D2, Biolegend; 1:10         |
| CF 594             | CD16          | 3G8, Biolegend, 1:300          |
